# Supplementary material for: Enhancing SMM properties in a family of [Mn6] clusters
Source: Royal Society of Chemistry journal article supplement (doi:10.1039/b705170k), 2007-01-01
Supplement: b705170k.pdf [file b705170k.pdf]

### Supporting Information

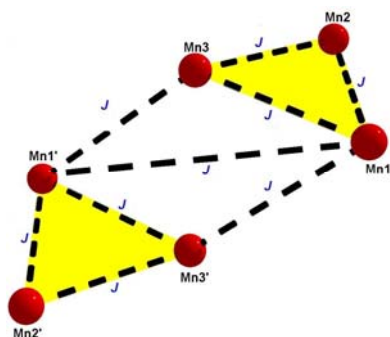

Figure SI1. The exchange interaction scheme employed for complexes **1** and **3**.

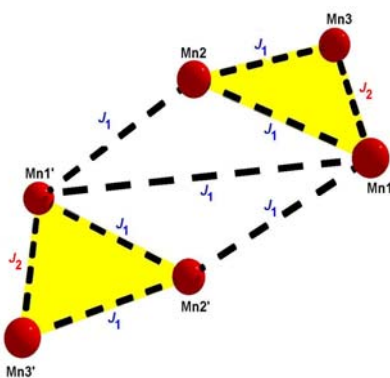

Figure SI2. The exchange interaction scheme employed for complex **2**.

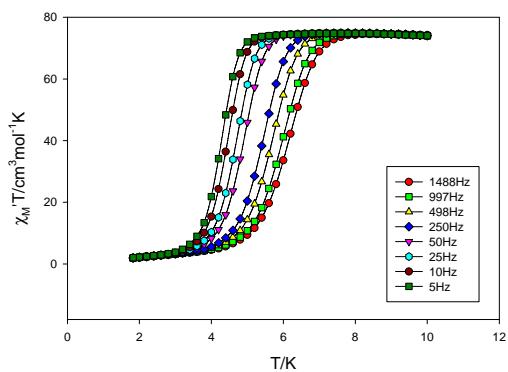

Figure SI3. In phase ( $\chi_M'$ ) ac susceptibility measurements for **3** at the indicated temperatures and frequencies.
